# Supplementary material
Source: PubMed Central journal article supplement (PMC6449153)
Supplement: NIHMS980528-supplement-1.pdf [file NIHMS980528-supplement-1.pdf]

A.

| HLA-A2 associated peptide   | Sequence          |
|-----------------------------|-------------------|
| <u>GAD(114-122)</u>         | <u>VMNILLQYV</u>  |
| <u>GAD(114-123)</u>         | <u>VMNILLQYVV</u> |
| <u>GAD(536-545)</u>         | <u>RMMEYGTMTV</u> |
| <u>PPI(2-10)</u>            | <u>ALWMRLLPL</u>  |
| <u>PPI(15-24)</u>           | <u>ALWGPDAAA</u>  |
| <u>PPI(34-42)</u>           | <u>HLVEALYLV</u>  |
| <u>PPI(90-99)</u>           | <u>GIVEQCCTSI</u> |
| <u>IGRP(228-236)</u>        | <u>LNIDLLWSV</u>  |
| <u>IA-2(797-805)</u>        | <u>MVWESGCTV</u>  |
| <u>ZnT8(186-194)</u>        | <u>VAANIVLTV</u>  |
| <u>EBV BMLF-1(280-288)</u>  | <u>GLCTLVAML</u>  |
| <u>Influenza M1(58-66)</u>  | <u>GILGFVFTL</u>  |
| <u>HIV-1 p17 Gag(77-85)</u> | <u>SLYNTVATL</u>  |

B.

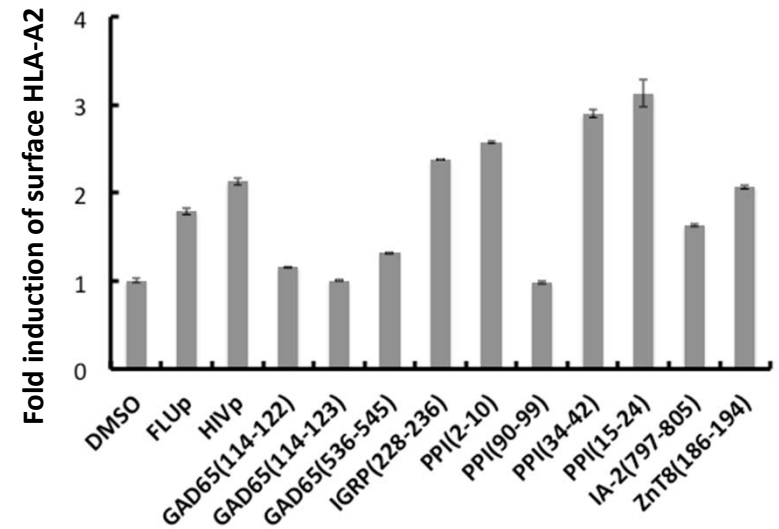

Supplemental Figure 1: Peptides used in this study A Peptide sequences. B Stability of HLA-A2 with diabetes antigen peptides in a T2 assay. The fold induction of HLA-A2 was measured by flow cytometry for each the designated peptides.

A.

| Fraction | Peptide   | Exp. 1 | Exp. 2 | p-value |
|----------|-----------|--------|--------|---------|
| CD45RO+  | EBVp+FLUp | 21/33  | 22/34  | 1.00    |
| CD45RA+  | EBVp+FLUp | 5/58   | 2/40   | 0.70    |

B.

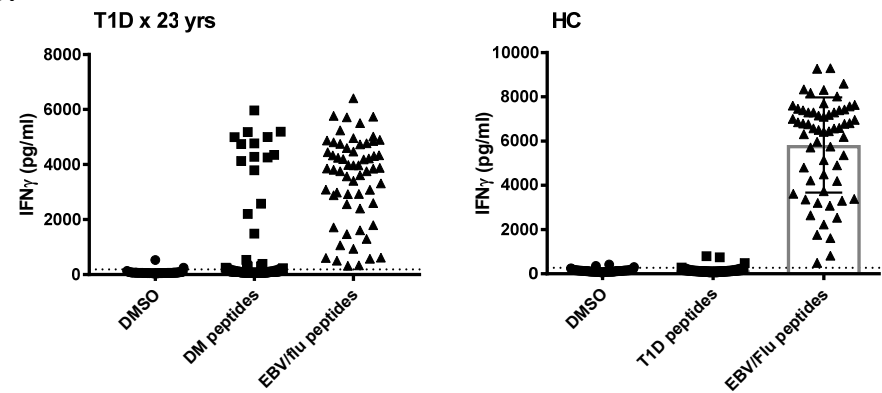

Supplemental Figure 2: Library performance: A. Reproducibility of libraries to EBV/FLU peptides. CD8<sup>+</sup> T cell libraries were prepared from the same healthy donor in 2 independent experiments. Positive wells/total wells are shown in the table after stimulation with indicated peptides. Frequency of positive wells were compared using Fisher's exact test. There was no significant difference on each condition between the experiments ( $p=0.70-1.00$ ). B. Examples of results from libraries from a patient with T1D for 23 years and a HC subject. Each symbol represents a library well.

A.

| Isotope     | Marker             |
|-------------|--------------------|
| 141Pr       | CCR6               |
| 142Nd       | CD19               |
| 144Nd       | CCR5               |
| 145Nd       | CD4                |
| 146Nd       | CD8a               |
| 147Sm       | Tetramer-147       |
| 148Nd       | CD28               |
| 149Sm       | CD25               |
| 151Eu       | CD5                |
| 152Sm       | BCL2               |
| 153Eu       | CCR4               |
| 154Gd       | CXCR5              |
| 155Gd       | CD27               |
| 156Gd       | CXCR3              |
| 158Gd       | CD3                |
| 159Tb       | CD57               |
| 160Gd       | T-bet              |
| 161Dy       | CTLA4              |
| 162Dy       | FoxP3              |
| 164Dy       | CD45RO             |
| 165Ho       | Tetramer-165       |
| 166Er       | Tetramer-166       |
| 167Er       | Tetramer-167       |
| 168Er       | CD127              |
| 169Tm       | CD45RA             |
| 170Yb       | CCR7               |
| 171Yb       | CD45-171           |
| 174Yb       | CD69               |
| 175Lu       | PD-1               |
| 176Yb       | Perforin           |
| 191Ir+193Ir | DNA                |
| 195Pt       | Cell-ID™ cisplatin |
| 198Pt       | CD45-198           |

B.

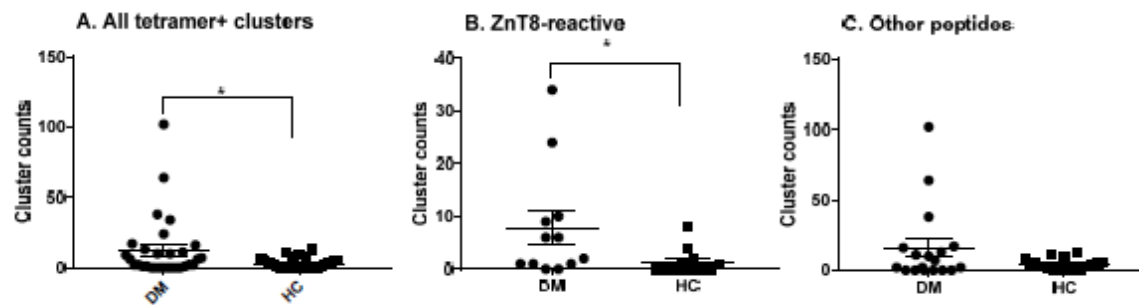

Supplemental Figure 3 CyTOF analysis: A. Antibodies and probes used for CyTOF analysis. B. Frequency of clusters of tetramer+ cells by CyTOF from the SAUCIE analysis. \*p<0.05 by Mann-Whitney

| Amino Acid              | TCRVbeta      | sum (%) | T1D63 |      |     |      | T1D69 |      | T1D116 |      |
|-------------------------|---------------|---------|-------|------|-----|------|-------|------|--------|------|
|                         |               |         | #1    | #16  | #60 | #81  | #2    | #4   | #3     | #23  |
| <b>CASSLGVGIGGYGYTF</b> | TCRBV27-01*01 | 95.4    | 4.7   | 55.5 | 2.4 | 32.7 | 0     | 0    | 0      | 0    |
| CASRVAGGPEETQYF         | TCRBV28-01*01 | 22.4    | 0     | 0    | 0   | 0    | 0     | 22.4 | 0      | 0    |
| CASSEAGGNEQYF           | TCRBV02-01*01 | 19.5    | 0     | 0    | 0   | 0    | 0     | 0    | 0      | 19.5 |
| CASSQVQGPGYGYTF         | TCRBV14-01*01 | 17.8    | 0     | 0    | 0   | 0    | 17.8  | 0    | 0      | 0    |
| <b>CATYSSSYEQYF</b>     | TCRBV27-01*01 | 14.4    | 0     | 0    | 0   | 0    | 0.1   | 14.3 | 0      | 0    |
| CASSITGEDTQYF           | TCRBV28-01*01 | 8.3     | 0     | 0    | 0   | 0    | 0     | 0    | 0      | 8.3  |
| CASSLVGWGDEQFF          | TCRBV07-03*01 | 8.1     | 0     | 0    | 0   | 0    | 0     | 0    | 0      | 8.1  |
| CASSLGGPEQYF            | TCRBV07-02*01 | 7.0     | 0     | 0    | 0   | 0    | 0     | 0    | 7.0    | 0    |
| <b>CASSLSSAYNEQFF</b>   | TCRBV27-01*01 | 6.8     | 0     | 0    | 0   | 0    | 5.4   | 1.4  | 0      | 0    |
| CASSQALSGDYGTYF         | TCRBV04-02*01 | 5.9     | 0     | 0    | 0   | 0    | 0     | 5.9  | 0      | 0    |
| CASRWGSDQPQHF           | TCRBV19-01    | 5.2     | 0     | 0    | 0   | 0    | 0     | 0    | 0      | 5.2  |
| CASSSSRFGLEQYF          | TCRBV05-04*01 | 5.1     | 0     | 0    | 0   | 0    | 5.1   | 0    | 0      | 0    |
| CASSNSWGEGQQFF          | TCRBV07-08*01 | 4.8     | 0     | 0    | 0   | 4.8  | 0     | 0    | 0      | 0    |
| CASSVASSTQGDGYTF        | TCRBV09-01    | 4.3     | 0     | 0    | 0   | 0    | 4.3   | 0    | 0      | 0    |
| CASSLRREIGPEAFF         | TCRBV28-01*01 | 4.2     | 0     | 0    | 0   | 0    | 0     | 0    | 0      | 4.2  |
| CASSLGQDDSGNTIYF        | TCRBV07-06*01 | 4.0     | 4.0   | 0    | 0   | 0    | 0     | 0    | 0      | 0    |
| CASKQTGGNSPLHF          | TCRBV19-01    | 3.7     | 0     | 0    | 0   | 0    | 0     | 0    | 0      | 3.7  |
| CASSVRASGNTIYF          | TCRBV09-01    | 3.6     | 0     | 0    | 0   | 3.6  | 0     | 0    | 0      | 0    |
| CASSWTVNEQFF            | TCRBV19-01    | 3.3     | 0     | 0    | 0   | 0    | 0     | 0    | 0      | 3.3  |
| CSAPPVGGQYTEAFF         | TCRBV20       | 3.0     | 0     | 0    | 0   | 0    | 0     | 0    | 3.0    | 0    |

Supplemental Table 1: TCR CDR sequences in positive wells from 3 individuals with T1D. Each column identifies a patient and the subcolumns identify a positive well. Sequences that were present at a frequency of at least 0.05% are displayed. The Vbeta sequence is shown. Bolded sequences are those found in more than 1 well. The sum represents the proportion of the total sequences represented by the identified sequences.
